# Supplementary material
Source: PubMed Central journal article supplement (PMC2779843)
Supplement: NIHMS89866-supplement-supplement_1.pdf [file NIHMS89866-supplement-supplement_1.pdf]

**Supplemental Table 1. List of candidate genes analyzed in this study, grouped by indication (disease or pharmacology).** Marker SNPs are all located in transcribed regions of the mature mRNA, or a splice variant. For some genes more than one marker SNP and tissue were used.

| Name                                                         | Symbol  | Indication                                              | Tissue<br>(number of<br>heterozygous<br>subjects) | Marker SNP                | % het | Replicates<br>(n) or assay<br>validation |
|--------------------------------------------------------------|---------|---------------------------------------------------------|---------------------------------------------------|---------------------------|-------|------------------------------------------|
| <b>Cardiovascular disease candidate genes</b>                |         |                                                         |                                                   |                           |       |                                          |
| Angiotensin I converting enzyme                              | ACE     | Blood pressure,<br>CAD                                  | Heart (31)                                        | rs4309 (exon 9)           | 51    | 6                                        |
|                                                              |         |                                                         | Small bowel<br>(32)                               |                           | 37    | 4                                        |
|                                                              |         |                                                         | Liver (10)                                        | rs4343 (exon 17)          | 40    | 6                                        |
|                                                              |         |                                                         | Heart (29)                                        | rs4586 (exon 2)           | 45    | 4                                        |
| Monocyte chemoattractant<br>protein 1                        | CCL2    | CAD, SLE,<br>inflammation,<br>infection                 | Monocytes<br>(26)                                 | rs13900 (3'UTR)           | 46    | 4                                        |
|                                                              |         |                                                         |                                                   |                           |       |                                          |
| Superoxide dismutase,<br>mitochondrial                       | SOD2    | Oxidative stress,<br>cancer                             | Heart (34)                                        | rs4880 (exon 2)           | 52    | 4                                        |
|                                                              |         |                                                         |                                                   | rs5746092 (5'UTR)         | 38    | 4                                        |
| Nicotinamide <i>N</i> -methyltransferase                     | NNMT    | Homocysteine<br>levels                                  | Liver (19)<br>Small bowel<br>(20)                 | rs4646335 (exon 1)        | 33    | 2                                        |
| Lipoprotein lipase                                           | LPL     | Triglyceride,<br>cholesterol<br>metabolism              | Heart (15)                                        | rs1059611 (exon 10)       | 23    | 3                                        |
| 3-hydroxy-3-methylglutaryl-CoA<br>reductase                  | HMGCR   | Cholesterol<br>synthesis, direct<br>target<br>(statins) | Liver (8)                                         | rs12916 (exon 19)         | 23    | 1                                        |
|                                                              |         |                                                         | B-lymph (18)                                      |                           | 20    | 1                                        |
| Colony-stimulating factor,<br>macrophage-specific            | CSF1    | Inflammation,<br>endothelial<br>function                | Monocytes<br>(18)                                 | rs333970 (exon 6)         | 43    | 4                                        |
| Prostaglandin D2 synthase                                    | PTGDS   | CAD                                                     | Heart (30)                                        | rs6926 (exon 7)           | 46    | 2                                        |
| Hypoxia-inducible factor 1, alpha<br>subunit                 | HIF1A   | Oxidative stress                                        | Heart (18)                                        | rs2057482 (exon 15)       | 28    | 2                                        |
| Nitric oxide synthase, endothelial                           | NOS3    | Oxidative stress,<br>vascular function                  | Heart (22)                                        | rs1799983 (exon 8)        | 34    | 4                                        |
| FMS-related tyrosine kinase                                  | FLT1    | Endothelial<br>function                                 | Heart (19)                                        | rs2296189 (exon 23)       | 29    | 2                                        |
| L-type voltage-dependent calcium<br>channel alpha subunit 1C | CACNA1C | Blood pressure                                          | Heart (37)                                        | rs1544514 (exon 4)        | 27    | 6                                        |
|                                                              |         |                                                         |                                                   | rs216008 (exon 30)        | 40    | 6                                        |
| Adrenergic receptor beta2                                    | ADRB2   | Blood pressure                                          | Heart (22)                                        | rs1042719 (exon1)         | 46    | 2                                        |
|                                                              |         |                                                         |                                                   | rs11739136 (exon 3)       | 12    | 6                                        |
|                                                              |         |                                                         |                                                   | rs2656842 (exon 4)        | 46    | 6                                        |
| BK channel beta1 subunit                                     | KCNMB1  | Blood pressure                                          | Heart (30)                                        | rs2656841 (exon 4)        | 47    | 6                                        |
|                                                              |         |                                                         |                                                   |                           |       |                                          |
| Vitamin K epoxide reductase                                  | VKORC1  | Warfarin target                                         | Liver (29)<br>Heart (26)<br>B-lymph (12)          | rs7294 (exon 3,<br>3'UTR) | 40    | 6                                        |
| Gamma-glutamyl carboxylase                                   | GGCX    | Blood<br>coagulation                                    | Liver (23)                                        | rs699664 (exon 8)         | 40    | 2                                        |
| Cholesteryl ester transfer protein                           | CETP    | HDL cholesterol<br>remodeling                           | Liver (29)                                        | rs5884 (exon 14)          | 47    | 6                                        |
| Heme oxygenase 1                                             | HMOX1   | Heme<br>catabolism                                      | Heart (5)                                         | rs11555832 (3'UTR)        | 8     | 1                                        |

| Drug metabolism candidate genes                         |         |                     |                                   |                          |    |   |
|---------------------------------------------------------|---------|---------------------|-----------------------------------|--------------------------|----|---|
| Multidrug resistance polypeptide 1, MDR1                | ABCB1   | Drug transporter    | Liver (22)                        | rs1045642 (exon 26)      | 50 | 6 |
|                                                         |         |                     |                                   | rs1128503 (exon 12)      | 44 | 6 |
|                                                         |         |                     |                                   | rs2032582 (exon 21)      | 47 | 6 |
| Cytochrome P450, subfamily 2D, polypeptide 6            | CYP2D6  | Drug metabolism     | Liver (26)                        | rs1065852 (exon 1)       | 26 | 6 |
|                                                         |         |                     |                                   | rs1058164 (exon 3)       | 32 | 6 |
|                                                         |         |                     |                                   | rs16947 (exon 6)         | 37 | 6 |
| Cytochrome P450, subfamily 2C, polypeptide 9            | CYP2C9  | Drug metabolism     | Liver (19)                        | rs1135840 (exon 9)       | 30 | 6 |
|                                                         |         |                     |                                   | rs9332242 (exon 9)       | 11 | 4 |
| Human peptide transporter 1                             | SLC15A1 | Transporter         | Small bowel (21)                  | rs1057911 (exon 9)       | 9  | 4 |
|                                                         |         |                     |                                   | rs1339067 (exon 17)      | 42 | 4 |
| Human peptide transporter 2                             | SLC15A2 | Transporter         | Kidney (8)                        | rs1143670 (exon 14)      | 45 | 4 |
|                                                         |         |                     |                                   | rs1143671 (exon 15)      | 45 | 4 |
| CNS disorder candidate genes                            |         |                     |                                   |                          |    |   |
| Dopamine D2 receptor                                    | DRD2    | CNS                 | Prefrontal cortex, all lobes (30) | rs6277 (exon 7)          | 44 | 6 |
|                                                         |         |                     |                                   | rs6275 (exon 7)          | 33 | 4 |
|                                                         |         |                     |                                   | rs6279 (3' UTR)          | 31 | 6 |
| Acetylcholine nicotinic receptor subunit a4             | CHRNA4  | CNS                 | Striatum (13)                     | rs1044393 (exon 5)       | 20 | 4 |
|                                                         |         |                     |                                   | rs1044397 (exon 5)       | 40 | 4 |
|                                                         |         |                     |                                   | rs2236196 (3' UTR)       | 44 | 4 |
| mu Opioid receptor                                      | OPRM1   | CNS                 | All lobes, Pons (8)               | rs1799971 (exon 1)       | 8  | 6 |
| Serotonin receptor 2A                                   | HTR2A   | CNS                 | Prefrontal cortex (16)            | rs6313 (exon 1)          | 15 | 2 |
| Brain-derived neurotrophic factor                       | BDNF    | CNS                 | All lobes (9)                     | rs6265 (exon 2)          | 35 | 4 |
| Serotonin transporter                                   | SLC6A4  | CNS                 | Pons (29)                         | rs1042173 (3'UTR)        | 60 | 3 |
| Tryptophan hydroxylase 2                                | TPH2    | CNS                 | Pons (27)                         | rs7305115 (exon 7)       | 38 | 4 |
|                                                         |         |                     |                                   | rs4290270 (exon 9)       | 46 | 2 |
| Norepinephrine transporter                              | SLC6A2  | CNS                 | Pons (18)                         | rs5569 (exon 9)          | 38 | 2 |
| Dysbindin 1                                             | DTNBP1  | CNS                 | Pons (9)                          | rs1047631(3'UTR)         | 15 | 2 |
| Neuregulin 1                                            | NRG1    | CNS                 | Pons (8)                          | SNP8NRG433E1006 (exon 1) | 17 | 2 |
| Serotonin receptor 1B                                   | HTR1B   | CNS                 | Pons (16)                         | rs6296 (exon 1)          | 33 |   |
| Monoamine oxidase A                                     | MAOA    | CNS                 | Prefrontal cortex (19)            | rs1137070 (exon 14)      | 47 | 3 |
|                                                         |         |                     |                                   | rs6323 (exon 8)          | 50 | 3 |
| Dopamine D3 receptor                                    | DRD3    | CNS                 | Prefrontal cortex (21)            | rs6280 (exon 2)          | 38 | 3 |
| Estrogen receptor                                       | ESR1    | CNS                 | Prefrontal cortex (46)            | rs3798577 (3'UTR)        | 44 | 3 |
| Dopamine transporter                                    | SLC6A3  | CNS                 | Striatum (21)                     | rs6347 (exon 9)          | 54 | 3 |
| Catechol-O-methyltransferase                            | COMT    | CNS                 | Prefrontal cortex (10)            | rs4633 (exon 3)          | 65 | 1 |
| Diamine oxidase                                         | DAO     | CNS                 | Prefrontal cortex (21)            | rs2070588 (5'UTR)        | 37 | 3 |
| Glucocorticoid receptor                                 | NR3C1   | CNS/stress hormonal | Prefrontal cortex (20)            | rs6196 (exon 8)          | 19 | 3 |
| Nad(p)h:menadiione oxidoreductase 1, dioxin-inducible 2 | NQO2    | CNS                 | B-lymph (9)                       | rs1143684 (exon 3)       | 30 | 1 |

**Supplemental Table 2. Oligonucleotide primers used for PCR amplification and SNaPshot primer extension reactions.** The reverse PCR primer also served for gene specific cDNA synthesis.

| Symbol         | Marker SNP(s) | Forward PCR primer                                                      | Reverse PCR primer                      | Extension primer                           |
|----------------|---------------|-------------------------------------------------------------------------|-----------------------------------------|--------------------------------------------|
| ACE            | rs4309        | 5'TGAGATGGGCCATATACAGTACTAC3'                                           | 5'CCCGACGCAGGGAGAC3'                    | 5'CTGCAGTACAAGGATCTGCC3'                   |
|                | rs4343        | 5'CCCTTACAAGCAGAGGTGAGCTAA<br>3'(DNA); 5'ACCACCTACAGCGTGGCC3'<br>(cDNA) | 5'CATGCCCATAACAGGTCTTCATATT3'           | 5'GACGAATGTGATGGCCAC3'                     |
| MCP1<br>(CCL2) | rs4586        | 5'ATGCAATCAATGCCCCAGTC3'                                                | 5'GCGAGCCTCTGCACTGAGAT3'                | 5'AGATCTTCTATTGGTGAAGTTATA3'               |
|                | rs13900       | 5'CAACCCAAGAATCTGCAGCTAA3'                                              | 5'GGCATAATGTTTCACATCAACAAAC3'           | 5'TAGCTTTCCCCAGACACC3'                     |
| SOD2           | rs4880        | 5'GGTTGTTACAGTAGGCCG3'                                                  | 5'CAGCAGGCAGCTGGCT3'                    | 5'GAGCCCAGATACCCCAAA3'                     |
|                | rs5746092     | 5'TTGCGGCGCAGCTGG3'                                                     | 5'CTGAAGCCGCTGCCGAA3'                   | 5'GGGCCTTAAGAAAGCGC3'                      |
| NNMT           | rs4646335     | 5'GTCCTGTCTCTGAACTTTGGG3'                                               | 5'GAGCTGTATGCAATGCTTGCC3'               | 5'ATTGTAGACCAGAGGGAGCACT3'                 |
| LPL            | rs1059611     | 5'TAAAGCAGCACATAGCACTGG3'                                               | 5'GCAGATAGCCACAATGACCTT3'               | 5'CCTTTCCAATATGTACAAGCTCC3'                |
| HMGCR          | rs12916       | 5'GCAAATATAAGCTGGGAAAAAGTTT3'                                           | 5'AATTAAC TACAAAATCAGGAGTTTCATCAG<br>3' | 5'AAATCCATTTTCAACTGGCAGG3'                 |
| CSF1           | rs333970      | 5'TTCCTCTCAGCATCTTCTCCAC3'                                              | 5'GGCAGATGGATGGTCTGTC3'                 | 5'GCCGGCAGATGTAAGTGTAC3'                   |
| PTGDS          | rs6926        | 5'GGGCTGAAGCTGGGATC3'                                                   | 5'CTGACTTGCTTCCGGAGTTT3'                | 5'CTCCCCGCCAAAGCA3'                        |
| HIF1A          | rs2057482     | 5'CATTCTTTTTTTGGACACTGGT3'                                              | 5'CAAGTTTGTGCAGTATTGTAGCCA3'            | 5'ATGTAGAAAATATAAATAGACTGCTTTA<br>GGTA3'   |
| NOS3           | rs1799983     | 5'GAAACGGTCGCTTCGACGT3'                                                 | 5'GGCAGAAGGAAGAGTTCTGGG3'               | 5'AGTAACCTTGAACCTTGGTGCAGGCC<br>CCAGATGA3' |
| FLT1           | rs2296189     | 5'AATACTCCGTAAGACCACAGTC3'                                              | 5'ACTCGACTTCTCTGAAATGGA3'               | 5'GCTGTAGATTTTGTCAAAGATAGATTC3'            |
| CACNA1C        | rs1544514     | 5'GAACGAGTGAATATCTCTTTCTCATAA3'                                         | 5'GCGGAGGTAGGCATTGGG3'                  | 5'CATAATTTTACGGTGAAGC3'                    |
|                | rs216008      | 5'CCAGAGCTGCCTGTTCAAAAAT3'                                              | 5'ATGAGCTTCAGGATCATCTCCAC3'             | 5'TGCTCTTCACTGGCCTCTT3'                    |
| ADRB2          | rs1042719     | 5'TTCCAGGAGCTTCTGTGCCT3'                                                | 5'GCCGTTGCTGGAGTAGCC3'                  | 5'TCTTCTTTGAAGGCCTATGG3'                   |
| KCNMB1         | rs11739136    | 5'CAGGAATCCAAGTGCCACC3'                                                 | 5'CCACAGGCATGGTACTGG3'                  | 5'CCAACATCAGGGACCAGGAG3'                   |
|                | rs2656842     | 5'AAGTAGAGCCATCCATCCATGC3'                                              | 5'GATTGGACTGGAAGAGTGGG3'                | 5'CTGCTCCCCACTTGCAG3'                      |
| VKORC1         | rs7294        | 5'TTTTCTAACTCGCCCGCT3'                                                  | 5'TGGGTGTAAAAAGAGCGAGC3'                | 5'CCTCTCCTGCCATACCC3'                      |
| GGCX           | rs699664      | 5'GAGTGGCCTCGGAAGCTG3'                                                  | 5'GGAACACTGGGCTGAGGG3'                  | 5'GGTGTCTACTGCCCCC3'                       |
| CETP           | rs5884        | 5'TCACCATGGGCATTTGATT3'                                                 | 5'CCACAGCGGT GATCATTGAC3'               | 5'TGAGAGCAGCTCCGAGTCC3'                    |
| HMOX1          | Rs11555832    | 5'GGAGTTTTGAGACAGCTGCC3'                                                | 5'CTGCAGCAGAGCCTGGAAG3'                 | 5'CTGCAGCAGAGCCTGGAAG3'                    |
| ABCB1          | rs1045642     | 5'CCTATGGAGACAACAGCCGG3'                                                | 5'GGCATGTATGTTGGCCTCCT3'                | 5'CTCCTTTGCTGCCCTCAC3'                     |
|                | rs1128503     | 5'TTTCTCACTCGTCTGGTAGATCTT3'                                            | 5'ACTGTTTCCAACCAGGGCC3'                 | 5'CTCTGCACCTTCAGGTTCAAG3'                  |
|                | rs2032582     | 5'TTGTGAAATGAAATGTTGTCTGG3'                                             | 5'CAATCATATTTAGTTTACTCACCTTCC3'         | 5'TGAAAGATAAGAAAGAACTAGAAGGT3'             |
|                | rs2656841     | 5'AAGTAGAGCCATCCATCCATGC3'                                              | 5'GATTGGACTGGAAGAGTGGG3'                | 5'GCAGGTGGAGAAGGCATTG3'                    |
| CYP2D6         | rs769258      | 5'TGTGTCCAGAGGAGCCCAT3'                                                 | 5'GGCTCACCAGGAAAGCAAA3'                 | 5'ACCGCCCGCCTGTGCCCATCA3'                  |
|                | rs1058164     | 5'TGTGTCCAGAGGAGCCCAT3'                                                 | 5'GGCTCACCAGGAAAGCAAA3'                 | 5'CGAGCAGAGGCGCTTCTCCGT3'                  |
|                | rs16947       | 5'TGTGTCCAGAGGAGCCCAT3'                                                 | 5'GGCTCACCAGGAAAGCAAA3'                 | 5'AGCTTCAATGATGAGAACCTG3'                  |
|                | rs1135840     | 5'GGCCAGCCACCATG3'                                                      | 5'GCACAGCACAAAGCTCATAGGG3'              | 5'GTGCTTTGCTTTCTGCTGTA3'                   |
| CYP2C9         | rs9332242     | 5'GGATTTGTGTGGGAGAAGCC3'                                                | 5'TGAAACATAGGAACTCTCC3'                 | 5'AATGCCTTTTCTACC3'                        |
| CYP2C9         | rs2017319     | 5'GGATTTGTGTGGGAGAAGCC3'                                                | 5'TGAAACATAGGAACTCTCC3'                 | 5'GGCGGCACAGAGGCAAA3'                      |
| SLC15A1        | rs1339067     | 5'ACATTTCTTCTCCTGGATCACCA3'                                             | 5'ACACTAGAAGCGTGTGGCGTT3'               | F: 5'CTGGATCACCAGTCACTGC3'                 |

## Running Title: Polymorphisms affecting RNA

|         |                     |                                 |                                |                                                      |
|---------|---------------------|---------------------------------|--------------------------------|------------------------------------------------------|
|         |                     |                                 |                                | R: 5'CTGCTTGAAGTCGTCAGTTAC3'                         |
| SLC15A2 | rs1143670           | 5'AGGAAAATGGCTGTTGGTATGATC3'    | 5'CGCAACTGCAAATGCCAG3'         | 5'GCTGTTGGTATGATCCTAGC3'                             |
|         | rs1143671           | 5'GAAATGGCCCCAGCCC3'            | 5'CATCTGCCAGATTCAAGACTTGTAG3'  | 5'AACCTCCTGGGGACCTG3'                                |
| DRD2    | rs6277              | 5'CCAGCTGACTCTCCCCGAC3'         | 5'GCATGCCATTCTTCTCTGG3'        | 5'CGATCACATGTCGTGAACTGACTG<br>ACTGGTTTGGCGGGGCTGTC3' |
|         | rs6275              | 5'CCAGCTGACTCTCCCCGAC3'         | 5'GCATGCCATTCTTCTCTGG3'        | 5'GGAGTGCTGTGGAGACC3'                                |
|         | rs6279              | 5'AGCCTGAGTCAGGGCCC3'           | 5'ACCGCCTGCTCCACG3'            | 5'CCCAGAGGCTGAGTTTTCT3'                              |
| CHRNA4  | rs1044393           | 5' TGAACATGCACAGCCGC3'          | 5' CGAAGGCATAGGTGATGTCC3'      | 5'TTGTAGGTGCCACGGC3'                                 |
|         | rs1044397           | 5' CACATGCAAGAAGGAGCCCT3'       | 5' GGTGGTCTGCAATGTACTGGA3'     | 5'CCGCAGCACAAAGC3'                                   |
|         | rs2236196           | 5' CCCTCTCCTAGCGAAGCAGAT3'      | 5' GGTCTTGAGCCTCTCGGG3'        | 5'CTAGCGAAGCAGATTGGAGC3'                             |
| OPRM1   | rs1799971           | 5'CCGTCAGTACCATGGACAGC3'        | 5'GAGTACGCCAAGGCATCAGT3'       | F: 5'ACTGATCGACTTGTCCACTTA<br>GATGGC3'               |
|         |                     |                                 |                                | R: 5'ACTGACTGACTGACCATGGGTC<br>GGACAGGT3'            |
| HTR2A   | rs6313              | 5'GACACCAGGCTCTACAGTAATGACTTT3' | 5'TGTCCAGTTAAATGCATCAGAAGTG3'  | 5'ACTGACTGACTGGAACCTTGACT<br>CATCAGAAGTGTAGCTTCTCC3' |
| BDNF    | rs6265              | 5'GCTTGACATCATTGGCTGACA3'       | 5'CTGGTCCTCATCCAACAGCTC3'      | 5'AACCTTGAACCTTGGGGCTGACT3'                          |
| SLC6A4  | rs1042173           | 5'TATCTGTTTGCTTCTAAAGGTTTC3'    | 5'TGGACACACTATTTTTCATTTAG      | 5'GGTTCTAGTAGATTCCAGCAATAAAATT<br>3'                 |
| TPH2    | rs7305115           | 5'ACGAGACTTTCTGGCAGGACTG3'      | 5'TTAATTCTCCAATGGAGGAAAGGA3'   | 5'GATCCCCTCTACACCCC3'                                |
|         | rs4290270           | 5'ACGAGACTTTCTGGCAGGACTG3'      | 5'TTAATTCTCCAATGGAGGAAAGGA3'   | 5'AAAGGAGTCTGCTCCATA3'                               |
| SLC6A2  | rs5569              | 5'ATGGGAGGCATGGAGGCTGTC3'       | 5'CGAGAAGGAAAGTGCTGAAGGTGAC3'  | 5'GGCATGGAGGCTGTCATCAC3'                             |
| DTNBP1  | rs1047631           | 5'ATCCAGTTTTGGCTGTATGC3'        | 5'CTGTTCTTTAAGTTTCTCACACATT3'  | 5'TGTTTTATAGAGTTCTTGATTTTTAC3'                       |
| NRG1    | SNP8NRG433<br>E1006 | 5'CTGCTGCCACTACTGCTGCTGCT3'     | 5'CACCTTCCCTCGATCACCA3'        | 5'TAGCACACCGAGGCC3'                                  |
| HTR1B   | rs6296              | 5'CCACGTCCTCGGTCACCTCTATTAAC3'  | 5'CACAATAAAGGCTCCCAAAATGATCC3' | 5'TCGAAATCCGGATCTCCTGTGTATGT3'                       |
| MAOA    | rs1137070           | 5'AAATGGTCTCGGAAGGTGA3'         | 5'TTTGATTCAGGTTCTGTACCCAG3'    | 5'GGAAGGTGACCGAGAAAGA3'                              |
|         | rs6323              | 5'ACTTCAGACCAGAGCTTCCAGC3'      | 5'ATGCACTTAATGACAGCTCCA3'      | 5'GAGAAACCAGTTAATTCAGCG3'                            |
| DRD3    | rs6280              | 5'TCTGCCCCACAGGTGTAGTTC3'       | 5'GGCATCTCTGAGCCAGCTG3'        | 5'ATCTCTGAGCCAGCTGAGT3'                              |
| ESR1    | rs3798577           | 5'TGGTGTTCATTTAGCCCTGG3'        | 5'AGCCACAACAATCCTGCACA3'       | 5'GGCATGGAGCTGAACAGTAC3'                             |
| SLC6A3  | rs6347              | 5'TTCATCATCTACCCGGAAGCC3'       | 5'GAAGAAGACCACGGCCCAG3'        | 5'ACGCTCCCTCTGTCTC3'                                 |
| COMT    | rs4633              | 5'GTGACACCAAGGAGCAGCG3'         | 5'TGTCAATGGCCTCCAGCAC3'        | 5'AGCGCATCCTGAACCA3'                                 |
| DAO     | rs2070588           | 5'GACGGGACTGATAACAGCAGC3'       | 5'CACAAGCATCCATTATCAA3'        | 5'CATCCAAGTCTCCCAACT3'                               |
| NR3C1   | rs6196              | 5'GGCAGTCACTTTTGTGAAACAGA3'     | 5'GAGTATTGAATCCCCGAGATGTTAG3'  | 5'CAATCAGATACCAAAATTTCAA3'                           |
| NQO2    | rs1143684           | 5'GCTGCACCGTCACAGTGTCT3'        | 5'TGATATCTTTGTCTGTGGCCCTC3'    | 5'GTCTGATTTGTATGCCATGAAC3'                           |
